# Supplementary material
Source: MDPI journal article supplement (https://www.mdpi.com/2073-445X/11/1/6)
Supplement: s1 [file s1]

# **Supplementary for: Habitat integrity in protected areas threatened by LULC changes and fragmentation: A case study in Tehran province, Iran**

**Parvaneh Sobhani<sup>1</sup>, Hassan Esmaeilzadeh<sup>1,\*</sup>, Shahindokht Barghjelveh<sup>1</sup>, Seyed Mohammad Moein Sadeghi<sup>2</sup> and Marina Viorela Marcu<sup>2</sup>**

<sup>1</sup> Environmental Sciences Research Institute, ShahidBeheshti University, Evin, Tehran 1983969411, Iran; sobhanipajoh@sbu.ac.ir (P.S.); s-barghjelveh@sbu.ac.ir (S.B.)

<sup>2</sup> Department of Forest Engineering, Forest Management Planning and Terrestrial Measurements, Faculty of Silviculture and Forest Engineering, Transilvania University of Brasov, Șirul Beethoven 1, 500123 Brasov, Romania; seyed.sadeghi@unitbv.ro or moeinsdgh@hotmail.com (S.M.M.S.); viorela.marcu@unitbv.ro (M.V.M.)

\* Correspondence: H\_esmaeilzadeh@sbu.ac.ir; Tel.: +98-912-537-9322

**Table S1.** Ground truth and LULC classes

| Lar national park             |          |            |                      |                      |                     |                 |       |
|-------------------------------|----------|------------|----------------------|----------------------|---------------------|-----------------|-------|
| Year                          |          | 2019       |                      |                      |                     |                 |       |
| Land use                      | Built-up | Water body | Cropland and garden  | High-density pasture | Low-density pasture | Total           |       |
| Built-up                      | 35       | 0          | 0                    | 6                    | 4                   | 45              |       |
| Water body                    | 0        | 25         | 0                    | 0                    | 0                   | 25              |       |
| Cropland and garden           | 0        | 0          | 22                   | 3                    | 5                   | 30              |       |
| High-density pasture          | 2        | 0          | 4                    | 54                   | 8                   | 68              |       |
| Low-density pasture           | 0        | 0          | 3                    | 9                    | 120                 | 132             |       |
| Total                         | 37       | 25         | 29                   | 72                   | 137                 | 300             |       |
| Jajrud PA                     |          |            |                      |                      |                     |                 |       |
| Land use                      | Built-up | Water body | Cropland and garden  | High-density pasture | Low-density pasture | Planted forests | Total |
| Built-up                      | 92       | 0          | 4                    | 3                    | 6                   | 0               | 105   |
| Water body                    | 2        | 24         | 0                    | 0                    | 0                   | 0               | 26    |
| Cropland and garden           | 0        | 0          | 12                   | 1                    | 3                   | 2               | 18    |
| High-density pasture          | 0        | 0          | 0                    | 36                   | 6                   | 0               | 42    |
| Low-density pasture           | 0        | 0          | 3                    | 2                    | 68                  | 0               | 73    |
| Planted forests               | 0        | 0          | 4                    | 1                    | 0                   | 31              | 36    |
| Total                         | 94       | 24         | 23                   | 43                   | 83                  | 33              | 300   |
| Tangeh Vashi natural monument |          |            |                      |                      |                     |                 |       |
| Land use                      | Built-up | Bare land  | High-density pasture |                      | Low-density pasture | Total           |       |
| Built-up                      | 69       | 6          | 0                    |                      | 0                   | 75              |       |
| Bare land                     | 3        | 118        | 2                    |                      | 12                  | 135             |       |
| High-density pasture          | 0        | 0          | 28                   |                      | 4                   | 32              |       |
| Low-density pasture           | 0        | 5          | 47                   |                      | 6                   | 58              |       |
| Total                         | 72       | 129        | 77                   |                      | 22                  | 300             |       |

**Table S2.** Confusion matrix

| Lar national park             |          |             |                      |                      |                     |                 |                 |                 |              |                 |                  |                  |
|-------------------------------|----------|-------------|----------------------|----------------------|---------------------|-----------------|-----------------|-----------------|--------------|-----------------|------------------|------------------|
| Year                          | 2019     |             |                      |                      |                     |                 |                 |                 |              |                 |                  |                  |
| Land use                      | Built-up | Water body  | Cropland and garden  | High-density pasture | Low-density pasture | Total           | Commiss ion (%) | Omission (%)    | User's Acc.  | Producer's Acc. | Overall accuracy |                  |
| Built-up                      | 11.66    | 0           | 0                    | 2                    | 1.33                | 14.99           | 0.03            | 0.83            | 0.87 ± 0.05  | 0.92 ± 0.17     | 0.92± 0.04       |                  |
| Water body                    | 0        | 8.33        | 0                    | 0                    | 0                   | 8.33            | 0.04            | 0.16            | 0.70 ± 0.30  | 0.50 ± 0.37     |                  |                  |
| Cropland and garden           | 0        | 0           | 7.33                 | 1                    | 1.66                | 9.99            | 0.02            | 0.01            | 0.80 ± 0.26  | 0.25 ± 0.13     |                  |                  |
| High-density pasture          | 0.66     | 0           | 1.33                 | 18                   | 2.66                | 22.65           | 0.4             | 0.02            | 0.93 ± 0.08  | 0.67 ± 0.12     |                  |                  |
| Low-density pasture           | 0        | 0           | 1                    | 3                    | 40                  | 44              | 0.07            | 0.44            | 0.90 ± 0.20  | 0.81 ± 0.24     |                  |                  |
| Jajrud PA                     |          |             |                      |                      |                     |                 |                 |                 |              |                 |                  |                  |
| Land use                      | Built-up | Water areas | Cropland and garden  | High-density pasture | Low-density pasture | Planted forests | Total           | Commiss ion (%) | Omission (%) | User's Acc.     | Producer's Acc.  | Overall accuracy |
| Built-up                      | 30.66    | 0           | 1.33                 | 1                    | 2                   | 0               | 34.98           | 0.32            | 0.87         | 0.88 ± 0.04     | 0.98 ± 0.02      | 0.97± 0.02       |
| Water areas                   | 0.66     | 8           | 0                    | 0                    | 0                   | 0               | 8.66            | 0.56            | 0.04         | 0.84 ± 0.12     | 0.78 ± 0.13      |                  |
| Cropland and garden           | 0        | 0           | 4                    | 0.33                 | 1                   | 0.66            | 5.98            | 1.3             | 0.1          | 0.79 ± 0.19     | 0.67 ± 0.18      |                  |
| High-density pasture          | 0        | 0           | 0                    | 12                   | 2                   | 0               | 14              | 0.02            | 0.16         | 0.90 ± 0.20     | 0.79 ± 0.22      |                  |
| Low-density pasture           | 0        | 0           | 1                    | 0.66                 | 22.66               | 0               | 24.32           | 0.9             | 1.1          | 0.94 ± 0.08     | 0.81 ± 0.24      |                  |
| Planted forests               | 0        | 0           | 1.33                 | 0.33                 | 0                   | 10.32           | 11.98           | 0.3             | 0.1          | 0.80 ± 0.21     | 0.93 ± 0.15      |                  |
| Tangeh Vashi natural monument |          |             |                      |                      |                     |                 |                 |                 |              |                 |                  |                  |
| Land use                      | Built-up | Bare land   | High-density pasture |                      | Low-density pasture | Total           | Commiss ion (%) | Omission (%)    | User's Acc.  | Producer's Acc. | Overall accuracy |                  |
| Built-up                      | 23       | 2           | 0                    |                      | 0                   | 25              | 0.3             | 0.1             | 0.81 ± 0.20  | 0.75 ± 0.18     | 0.98± 0.01       |                  |
| Bare land                     | 1        | 93.33       | 0.66                 |                      | 4                   | 98.99           | 0.02            | 0.18            | 0.78 ± 0.18  | 0.98 ± 0.02     |                  |                  |
| High-density pasture          | 0        | 0           | 9.33                 |                      | 1.33                | 10.66           | 0.07            | 0.1             | 0.50 ± 0.33  | 0.90 ± 0.22     |                  |                  |
| Low-density pasture           | 0        | 1.66        | 15.66                |                      | 2                   | 19.32           | 0.03            | 0.16            | 0.80 ± 0.21  | 0.93 ± 0.75     |                  |                  |

**Table S3.** Impacts of habitat fragmentation in the studied areas (results of round 1 of Delphi method)

| Study site        | Impacts                                                                                                                    | n  | Mean | SD    | V     | Rank | Total mean |
|-------------------|----------------------------------------------------------------------------------------------------------------------------|----|------|-------|-------|------|------------|
| Lar national park | (1) Decrease of habitat integrity (source and sink)                                                                        | 40 | 4.38 | 1.000 | 2.000 | 1    | 3.11       |
|                   | (2) Change of the patterns and spatial elements' structure (size, shape, number, type, composition, and status of habitat) | 40 | 3.95 | 1.000 | 1.060 | 3    |            |
|                   | (3) Change in the ecosystem function (flow of matter, energy and information, etc.)                                        | 40 | 4.28 | 1.029 | 1.000 | 2    |            |
|                   | (4) Decrease of stability and increase of the edge effect of patches                                                       | 40 | 3.66 | 1.000 | 2.030 | 5    |            |
|                   | (5) Change of ecological flows                                                                                             | 40 | 3.72 | 1.000 | 1.000 | 4    |            |
|                   | (6) Decreased of resilience and biological capacity of species                                                             | 40 | 3.15 | 1.029 | 1.000 | 10   |            |
|                   | (7) Habitat destruction and decrease of biodiversity and genetic                                                           | 40 | 3.36 | 1.000 | 1.000 | 6    |            |
|                   | (8) Increase of inbreeding among species                                                                                   | 40 | 2.46 | 1.000 | 1.000 | 22   |            |
|                   | (9) Extinction of biologically valuable species (fauna and flora)                                                          | 40 | 3.15 | 1.000 | 2.000 | 8    |            |
|                   | (10) Change of the species' diet and their migration path                                                                  | 40 | 2.93 | 1.000 | 2.055 | 13   |            |
|                   | (11) Change of habitat' boundary                                                                                           | 40 | 2.43 | 1.000 | 1.000 | 23   |            |
|                   | (12) Change of ecological process in the area                                                                              | 40 | 3.27 | 1.000 | 1.000 | 7    |            |
|                   | (13) Increase of isolated habitat                                                                                          | 40 | 2.58 | 1.029 | 1.064 | 21   |            |
|                   | (14) Reduction and loss of vegetation in the area                                                                          | 40 | 3.05 | 1.000 | 1.000 | 9    |            |
|                   | (15) Increase of climate change                                                                                            | 40 | 3.01 | 1.000 | 1.000 | 11   |            |
|                   | (16) Increased environmental pollution                                                                                     | 40 | 2.98 | 1.000 | 1.000 | 12   |            |
|                   | (17) Decrease of the reservoirs of groundwater aquifers and change in surface water regime                                 | 40 | 2.88 | 1.000 | 1.000 | 14   |            |
|                   | (18) Change of geo-biochemical cycles                                                                                      | 40 | 2.81 | 1.000 | 1.000 | 16   |            |
|                   | (19) Decrease of ecosystem services                                                                                        | 40 | 2.84 | 1.000 | 2.030 | 15   |            |
|                   | (20) Increase of water evaporation level                                                                                   | 40 | 2.76 | 1.030 | 1.000 | 17   |            |
|                   | (21) Increase of soil erosion level (sedimentation and decrease of soil fertility level)                                   | 40 | 2.60 | 1.000 | 1.000 | 20   |            |
|                   | (22) Disturbance of landscape and environmental desirability                                                               | 40 | 2.71 | 1.000 | 1.000 | 18   |            |
|                   | (23) Increase of abrupt environmental crises (such as storm, flood earthquake, etc.)                                       | 40 | 2.62 | 1.000 | 1.000 | 19   |            |
| Jajroud PA        | (1) Decrease of habitat integrity (source and sink)                                                                        | 40 | 4.38 | 1.000 | 1.000 | 2    | 3.63       |
|                   | (2) Change of the patterns and spatial elements' structure (size, shape, number, type, composition, and status of habitat) | 40 | 4.75 | 1.000 | 2.000 | 1    |            |
|                   | (3) Change in the ecosystem function (flow of matter, energy and information, etc.)                                        | 40 | 4.26 | 1.000 | 1.060 | 3    |            |
|                   | (4) Decrease of stability and increase of the edge effect of patches                                                       | 40 | 4.16 | 1.000 | 1.000 | 5    |            |
|                   | (5) Change of ecological flows                                                                                             | 40 | 4.20 | 1.000 | 1.043 | 4    |            |
|                   | (6) Decreased of resilience and biological capacity of species                                                             | 40 | 3.92 | 1.000 | 1.000 | 7    |            |
|                   | (7) Habitat destruction and decrease of biodiversity and genetic                                                           | 40 | 4.03 | 1.029 | 1.000 | 6    |            |
|                   | (8) Change of habitat' boundary                                                                                            | 40 | 2.48 | 1.000 | 1.000 | 22   |            |
|                   | (9) Extinction of biologically valuable species (fauna and flora)                                                          | 40 | 3.88 | 1.000 | 1.000 | 8    |            |
|                   | (10) Change of the species' diet and their migration path                                                                  | 40 | 3.84 | 1.000 | 1.000 | 9    |            |
|                   | (11) Increase of inbreeding among species                                                                                  | 40 | 2.43 | 1.000 | 1.000 | 23   |            |
|                   | (12) Change of ecological process in the area                                                                              | 40 | 3.80 | 1.000 | 1.000 | 10   |            |
|                   | (13) Increase of isolated habitat                                                                                          | 40 | 2.56 | 1.000 | 1.000 | 21   |            |
|                   | (14) Reduction and loss of vegetation in the area                                                                          | 40 | 3.77 | 1.000 | 2.030 | 11   |            |
|                   | (15) Increase of climate change                                                                                            | 40 | 3.66 | 1.000 | 1.000 | 13   |            |
|                   | (16) Increased environmental pollution                                                                                     | 40 | 3.72 | 1.000 | 1.000 | 12   |            |
|                   | (17) Decrease of the reservoirs of groundwater aquifers and change in surface water regime                                 | 40 | 3.54 | 1.000 | 1.000 | 15   |            |
|                   | (18) Change of geo-biochemical cycles                                                                                      | 40 | 3.48 | 1.000 | 1.000 | 16   |            |
|                   | (19) Decrease of ecosystem services                                                                                        | 40 | 3.57 | 1.000 | 1.000 | 14   |            |
|                   | (20) Increase of water evaporation level                                                                                   | 40 | 3.21 | 1.000 | 1.000 | 20   |            |
|                   | (21) Increase of soil erosion level (sedimentation and decrease of soil fertility level)                                   | 40 | 3.42 | 1.000 | 1.000 | 17   |            |
|                   | (22) Disturbance of landscape and environmental desirability                                                               | 40 | 3.27 | 1.000 | 1.000 | 19   |            |
|                   | (23) Increase of abrupt environmental crises (such as storm, flood earthquake, etc.)                                       | 40 | 3.35 | 1.000 | 2.000 | 18   |            |

|                               |                                                                                                                            |    |      |       |       |    |      |
|-------------------------------|----------------------------------------------------------------------------------------------------------------------------|----|------|-------|-------|----|------|
|                               | (1) Decrease of habitat integrity (source and sink)                                                                        | 40 | 3.43 | 1.029 | 1.064 | 6  | 3.01 |
| Tangeh Vashi natural monument | (2) Change of the patterns and spatial elements' structure (size, shape, number, type, composition, and status of habitat) | 40 | 3.64 | 1.000 | 1.000 | 3  |      |
|                               | (3) Change in the ecosystem function (flow of matter, energy and information, etc.)                                        | 40 | 3.55 | 1.000 | 1.000 | 4  |      |
|                               | (4) Decrease of stability and increase of the edge effect of patches                                                       | 40 | 3.80 | 1.000 | 1.000 | 1  |      |
|                               | (5) Change of ecological flows                                                                                             | 40 | 3.72 | 1.000 | 1.000 | 2  |      |
|                               | (6) Decreased of resilience and biological capacity of species                                                             | 40 | 3.46 | 1.000 | 2.033 | 5  |      |
|                               | (7) Habitat destruction and decrease of biodiversity and genetic                                                           | 40 | 3.38 | 1.000 | 1.000 | 7  |      |
|                               | (8) Change of habitat' boundary                                                                                            | 40 | 2.41 | 1.000 | 1.000 | 23 |      |
|                               | (9) Extinction of biologically valuable species (fauna and flora)                                                          | 40 | 3.26 | 1.000 | 1.054 | 8  |      |
|                               | (10) Change of the species' diet and their migration path                                                                  | 40 | 3.08 | 1.000 | 1.000 | 11 |      |
|                               | (11) Change of ecological process in the area                                                                              | 40 | 3.10 | 1.000 | 1.000 | 10 |      |
|                               | (12) Increase of isolated habitat                                                                                          | 40 | 2.50 | 1.000 | 1.000 | 21 |      |
|                               | (13) Reduction and loss of vegetation in the area                                                                          | 40 | 3.15 | 1.000 | 1.000 | 9  |      |
|                               | (14) Increase of climate change                                                                                            | 40 | 2.77 | 1.000 | 1.000 | 15 |      |
|                               | (15) Increase of inbreeding among species                                                                                  | 40 | 2.44 | 1.000 | 1.000 | 22 |      |
|                               | (16) Increased environmental pollution                                                                                     | 40 | 2.85 | 1.000 | 1.055 | 14 |      |
|                               | (17) Decrease of the reservoirs of groundwater aquifers and change in surface water regime                                 | 40 | 2.95 | 1.000 | 1.033 | 12 |      |
|                               | (18) Change of geo-biochemical cycles                                                                                      | 40 | 2.73 | 1.029 | 1.000 | 16 |      |
|                               | (19) Decrease of ecosystem services                                                                                        | 40 | 2.56 | 1.000 | 1.000 | 19 |      |
|                               | (20) Increase of water evaporation level                                                                                   | 40 | 2.58 | 1.000 | 2.000 | 18 |      |
|                               | (21) Increase of soil erosion level (sedimentation and decrease of soil fertility level)                                   | 40 | 2.63 | 1.000 | 1.000 | 17 |      |
|                               | (22) Disturbance of landscape and environmental desirability                                                               | 40 | 2.53 | 1.000 | 1.000 | 20 |      |
|                               | (23) Increase of abrupt environmental crises (such as storm, flood earthquake, etc.)                                       | 40 | 2.88 | 1.000 | 1.000 | 13 |      |

**Table S4.** Impacts of habitat fragmentation in the studied areas (results of round 2 of Delphi method)

| Study site           | Impacts                                                                                                                    | n  | Mean | SD    | V     | Rank | Total mean |
|----------------------|----------------------------------------------------------------------------------------------------------------------------|----|------|-------|-------|------|------------|
| Lar national park    | (1) Decrease of habitat integrity (source and sink)                                                                        | 36 | 4.46 | 1.000 | 2.000 | 1    | 3.21       |
|                      | (2) Change of the patterns and spatial elements' structure (size, shape, number, type, composition, and status of habitat) | 36 | 4.41 | 1.000 | 1.060 | 2    |            |
|                      | (3) Change in the ecosystem function (flow of matter, energy and information, etc.)                                        | 36 | 4.38 | 1.029 | 1.000 | 3    |            |
|                      | (4) Decrease of stability and increase of the edge effect of patches                                                       | 36 | 3.73 | 1.000 | 2.030 | 5    |            |
|                      | (5) Change of ecological flows                                                                                             | 36 | 3.78 | 1.000 | 1.000 | 4    |            |
|                      | (6) Decreased of resilience and biological capacity of species                                                             | 36 | 3.09 | 1.029 | 1.000 | 10   |            |
|                      | (7) Habitat destruction and decrease of biodiversity and genetic                                                           | 36 | 3.28 | 1.000 | 1.000 | 6    |            |
|                      | (8) Extinction of biologically valuable species (fauna and flora)                                                          | 36 | 3.15 | 1.000 | 2.000 | 8    |            |
|                      | (9) Change of the species' diet and their migration path                                                                   | 36 | 2.94 | 1.000 | 2.055 | 13   |            |
|                      | (10) Change of ecological process in the area                                                                              | 36 | 3.22 | 1.000 | 1.000 | 7    |            |
|                      | (11) Increase of isolated habitat                                                                                          | 36 | 2.48 | 1.029 | 1.064 | 21   |            |
|                      | (12) Reduction and loss of vegetation in the area                                                                          | 36 | 3.12 | 1.000 | 1.000 | 9    |            |
|                      | (13) Increase of climate change                                                                                            | 36 | 3.06 | 1.000 | 1.000 | 11   |            |
|                      | (14) Increased environmental pollution                                                                                     | 36 | 3.00 | 1.000 | 1.000 | 12   |            |
|                      | (15) Decrease of the reservoirs of groundwater aquifers and change in surface water regime                                 | 36 | 2.90 | 1.000 | 1.000 | 14   |            |
|                      | (16) Change of biogeochemical cycles                                                                                       | 36 | 2.85 | 1.000 | 1.000 | 16   |            |
|                      | (17) Decrease of ecosystem services                                                                                        | 36 | 2.88 | 1.000 | 2.030 | 15   |            |
|                      | (18) Increase of water evaporation level                                                                                   | 36 | 2.76 | 1.030 | 1.000 | 17   |            |
|                      | (19) Increase of soil erosion level (sedimentation and decrease of soil fertility level)                                   | 36 | 2.61 | 1.000 | 1.000 | 20   |            |
|                      | (20) Disturbance of landscape and environmental desirability                                                               | 36 | 2.75 | 1.000 | 1.000 | 18   |            |
|                      | (21) Increase of abrupt environmental crises (such as storm, flood earthquake, etc.)                                       | 36 | 2.64 | 1.000 | 1.000 | 19   |            |
| Jajroud PA           | (1) Decrease of habitat integrity (source and sink)                                                                        | 36 | 4.48 | 1.000 | 1.000 | 2    | 3.77       |
|                      | (2) Change of the patterns and spatial elements' structure (size, shape, number, type, composition, and status of habitat) | 36 | 4.55 | 1.000 | 2.000 | 1    |            |
|                      | (3) Change in the ecosystem function (flow of matter, energy and information, etc.)                                        | 36 | 4.43 | 1.000 | 1.060 | 3    |            |
|                      | (4) Decrease of stability and increase of the edge effect of patches                                                       | 36 | 4.24 | 1.000 | 1.000 | 5    |            |
|                      | (5) Change of ecological flows                                                                                             | 36 | 4.38 | 1.000 | 1.043 | 4    |            |
|                      | (6) Decreased of resilience and biological capacity of species                                                             | 36 | 3.95 | 1.000 | 1.000 | 7    |            |
|                      | (7) Habitat destruction and decrease of biodiversity and genetic                                                           | 36 | 4.05 | 1.029 | 1.000 | 6    |            |
|                      | (8) Extinction of biologically valuable species (fauna and flora)                                                          | 36 | 3.91 | 1.000 | 1.000 | 8    |            |
|                      | (9) Change of the species' diet and their migration path                                                                   | 36 | 3.88 | 1.000 | 1.000 | 9    |            |
|                      | (10) Change of ecological process in the area                                                                              | 36 | 3.86 | 1.000 | 1.000 | 10   |            |
|                      | (11) Increase of isolated habitat                                                                                          | 36 | 2.43 | 1.000 | 1.000 | 21   |            |
|                      | (12) Reduction and loss of vegetation in the area                                                                          | 36 | 3.81 | 1.000 | 2.030 | 11   |            |
|                      | (13) Increase of climate change                                                                                            | 36 | 3.68 | 1.000 | 1.000 | 13   |            |
|                      | (14) Increased environmental pollution                                                                                     | 36 | 3.75 | 1.000 | 1.000 | 12   |            |
|                      | (15) Decrease of the reservoirs of groundwater aquifers and change in surface water regime                                 | 36 | 3.58 | 1.000 | 1.000 | 15   |            |
|                      | (16) Change of biogeochemical cycles                                                                                       | 36 | 3.52 | 1.000 | 1.000 | 16   |            |
|                      | (17) Decrease of ecosystem services                                                                                        | 36 | 3.64 | 1.000 | 1.000 | 14   |            |
|                      | (18) Increase of water evaporation level                                                                                   | 36 | 3.08 | 1.000 | 1.000 | 20   |            |
|                      | (19) Increase of soil erosion level (sedimentation and decrease of soil fertility level)                                   | 36 | 3.48 | 1.000 | 1.000 | 17   |            |
|                      | (20) Disturbance of landscape and environmental desirability                                                               | 36 | 3.21 | 1.000 | 1.000 | 19   |            |
|                      | (21) Increase of abrupt environmental crises (such as storm, flood earthquake, etc.)                                       | 36 | 3.33 | 1.000 | 2.000 | 18   |            |
| Tangeh Vashi natural | (1) Decrease of habitat integrity (source and sink)                                                                        | 36 | 3.41 | 1.029 | 1.064 | 6    | 3.06       |
|                      | (2) Change of the patterns and spatial elements' structure (size, shape, number, type, composition, and status of habitat) | 36 | 3.54 | 1.000 | 1.000 | 3    |            |
|                      | (3) Change in the ecosystem function (flow of matter, energy and information, etc.)                                        | 36 | 3.48 | 1.000 | 1.000 | 4    |            |

|                                                                                            |    |      |       |       |    |
|--------------------------------------------------------------------------------------------|----|------|-------|-------|----|
| (4) Decrease of stability and increase of the edge effect of patches                       | 36 | 3.66 | 1.000 | 1.000 | 1  |
| (5) Change of ecological flows                                                             | 36 | 3.61 | 1.000 | 1.000 | 2  |
| (6) Decreased of resilience and biological capacity of species                             | 36 | 3.44 | 1.000 | 2.033 | 5  |
| (7) Habitat destruction and decrease of biodiversity and genetic                           | 36 | 3.38 | 1.000 | 1.000 | 7  |
| (8) Extinction of biologically valuable species (fauna and flora)                          | 36 | 3.25 | 1.000 | 1.054 | 8  |
| (9) Change of the species' diet and their migration path                                   | 36 | 3.07 | 1.000 | 1.000 | 11 |
| (10) Change of ecological process in the area                                              | 36 | 3.14 | 1.000 | 1.000 | 10 |
| (11) Increase of isolated habitat                                                          | 36 | 2.42 | 1.000 | 1.000 | 21 |
| (12) Reduction and loss of vegetation in the area                                          | 36 | 3.16 | 1.000 | 1.000 | 9  |
| (13) Increase of climate change                                                            | 36 | 2.81 | 1.000 | 1.000 | 15 |
| (14) Increased environmental pollution                                                     | 36 | 2.84 | 1.000 | 1.055 | 14 |
| (15) Decrease of the reservoirs of groundwater aquifers and change in surface water regime | 36 | 2.95 | 1.000 | 1.033 | 12 |
| (16) Change of biogeochemical cycles                                                       | 36 | 2.77 | 1.029 | 1.000 | 16 |
| (17) Decrease of ecosystem services                                                        | 36 | 2.61 | 1.000 | 1.000 | 19 |
| (18) Increase of water evaporation level                                                   | 36 | 2.65 | 1.000 | 2.000 | 18 |
| (19) Increase of soil erosion level (sedimentation and decrease of soil fertility level)   | 36 | 2.74 | 1.000 | 1.000 | 17 |
| (20) Disturbance of landscape and environmental desirability                               | 36 | 2.55 | 1.000 | 1.000 | 20 |
| (21) Increase of abrupt environmental crises (such as storm, flood earthquake, etc.)       | 36 | 2.91 | 1.000 | 1.000 | 13 |

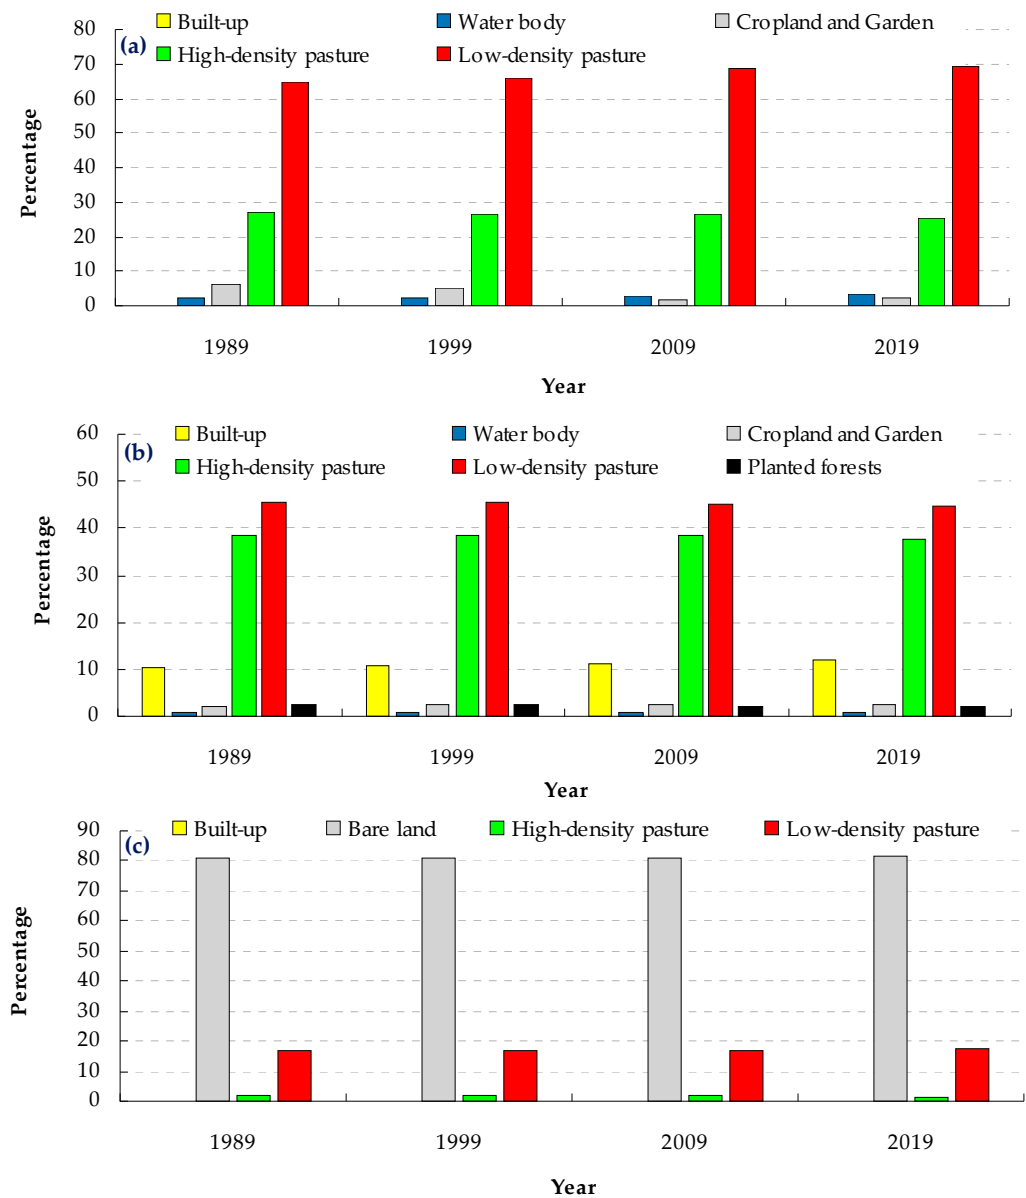

**Figure S1.** Percentage of LULC changes in the studied areas from 1989 to 2019; a) Lar, b) Jajrud, c) TangehVashi.
